# Supplementary material for: Developing a depression care model for the hill tribes: a family and community-based participatory research
Source: Research Square preprint supplement (doi:10.21203/rs.3.rs-2707372/v1), 2023-04-11
Supplement: Supplementary file 1 [file cb33fec6d4fba6fe09fd0eb6.docx]

**Developing a depression care model for the hill tribes: a family and community-based participatory research**

**Table 1** Participants in basic screening and counselling for village health volunteers (n=28)

Characteristics of participants N or Mean % or SD

Gender (male/female) 6/22 21.40/78.6

Age (in years) 42.32 (min = 32/max = 58) 6.00

Marital status

Single 2 7.1

Married 26 92.9

Education

Illiterate 3 10.70

Primary school 23 82.10

Secondary 1 3.6

Diploma 1 3.6

Sufficient income (yes/no) 16/12 57.14/42.86

**Table 2** Change in participants knowledge and basic counselling and depression screening skills before and after the training

Knowledge Basic screening and counselling

Median score (n=28)

Before training 4 3

After training 8 7

Median change in percentage

points (delta) (n=28) 4 4

Signed rank test statistic (Z) -4.659 -4.194

*p*-value <0.001 <0.001
